# Supplementary material
Source: HighWire-hosted journal article supplement (https://gh.bmj.com/content/8/4/e010934)

## Supplementary Materials

Improving coverage of antenatal iron and folic acid supplementation and malaria prophylaxis through targeted information and home deliveries in rural south-central Côte d'Ivoire: a cluster randomized controlled trial

### Contents

|                                                                                                                        |    |
|------------------------------------------------------------------------------------------------------------------------|----|
| Supplemental Materials Table ST1: Difference in follow-up rates across arms .....                                      | 2  |
| Supplemental Materials Table ST2: Intervention impact on mean haemoglobin.....                                         | 3  |
| Supplemental Materials Table ST3: Intervention impact on mild, moderate and severe anaemia.....                        | 4  |
| Supplemental Materials Table ST4: Intervention impact on mean IFA supplements .....                                    | 5  |
| Supplemental Materials Table ST5: Intervention impact on anaemia and malaria using generalized linear models .....     | 6  |
| Supplemental Materials Table ST6: Intervention impact on ANC attendance, IFA and SP compliance .....                   | 7  |
| Supplemental Materials Table ST7: Intervention impact on miscarriage, stillbirth, birthweight and low birthweight..... | 8  |
| Supplemental Materials Figure SF1: Change in haemoglobin concentration between baseline and endline by study arm.....  | 9  |
| Supplemental Materials Figure SF2: Sulfadoxine-Pyrimethamine used for malaria prophylaxis.....                         | 10 |
| Supplemental Materials Figure SF3: Ferric hydroxide polymaltose acid used .....                                        | 11 |
| Supplemental Materials Figure SF4: HRP2-based rapid diagnostic test used to test malaria parasitaemia.....             | 12 |

**Supplemental Materials Table ST1: Difference in follow-up rates across arms**

|            | Baseline                           | Endline survey | Follow-up rate |
|------------|------------------------------------|----------------|----------------|
|            | survey                             |                |                |
|            | N                                  | n              | %              |
| Control    | 249                                | 231            | 92.8           |
| INFO       | 258                                | 242            | 93.8           |
| INFO+DELIV | 260                                | 243            | 93.5           |
| Total      | 767                                | 716            | 93.4           |
| F-test     | F(2, 90) = 0.11, Prob > F = 0.8990 |                |                |

**Supplementary Materials Table ST2: Intervention impact on mean haemoglobin**

| PANEL A: Unadjusted Impact Estimates |                              |
|--------------------------------------|------------------------------|
| VARIABLES                            | Hemoglobin (grams per liter) |
|                                      | Coeff (95%CI)                |
| INFO                                 | -0.001 (-2.45 - 2.45)        |
| INFO+DELIV                           | 1.67 (-1.08 - 4.42)          |
| Control group                        | 111.01** (109.17 - 112.86)   |
| Observations                         | 716                          |
| R-squared                            | 0.003                        |
| PANEL B: Adjusted Impact Estimates   |                              |
| INFO                                 | -0.03 (-2.59 - 2.53)         |
| INFO+DELIV                           | 1.65 (-1.13 - 4.43)          |
| Observations                         | 716                          |
| R-squared                            | 0.02                         |

\*\* if p-value <0.0125

Panel A shows unadjusted models that control for home delivery and information interventions fixed effects only. Panel B shows adjusted models that control for mother's and household's characteristics with clustering at the neighbourhood ("quartier") level. Coefficients reflect mean differences with 95% CIs in parentheses.

### Supplementary Materials Table ST3: Intervention impact on mild, moderate and severe anaemia

| PANEL A: Unadjusted Impact Estimates |                            |                                |                              |
|--------------------------------------|----------------------------|--------------------------------|------------------------------|
| VARIABLES                            | Mild anaemia<br>OR (95%CI) | Moderate anaemia<br>OR (95%CI) | Severe anaemia<br>OR (95%CI) |
| INFO                                 | 0.81 (0.51 - 1.29)         | 1.31 (0.80 - 2.15)             | 0.19 (0.02 - 1.75)           |
| INFO+DELIV                           | 0.76 (0.48 - 1.20)         | 0.97 (0.59 - 1.59)             | 0.38 (0.09 - 1.64)           |
| Observations                         | 716                        | 716                            | 716                          |
| PANEL B: Adjusted Impact Estimates   |                            |                                |                              |
| INFO                                 | 0.84 (0.53 - 1.33)         | 1.27 (0.76 - 2.12)             | 0.17 (0.02 - 1.65)           |
| INFO+DELIV                           | 0.79 (0.50 - 1.25)         | 0.98 (0.60 - 1.61)             | 0.36 (0.09 - 1.41)           |
| Observations                         | 716                        | 716                            | 399                          |

Notes: Figure shows estimated treatment impact on mild, moderate and severe anaemia. Mild anaemia was defined as haemoglobin concentration of 100-<110 g/L. Moderate anaemia was defined as haemoglobin concentration of 70-<100 g/l, and severe anaemia was defined as haemoglobin concentration less than 70 g/L. Panel A shows unadjusted models that control for home delivery and information interventions only. Panel B shows adjusted models that control for mother's and household's characteristics. All models allow for clustered standard errors at the neighbourhood ("quartier") level. Estimated coefficients are odds ratios with 95% CIs in parentheses.

**Supplementary Materials Table ST4: Intervention impact on mean IFA supplements**

|             | Mean number of<br>IFA supplements | Adjusted Impact Estimates |         |                 |
|-------------|-----------------------------------|---------------------------|---------|-----------------|
|             | Mean                              | $\beta$                   | P value | 95% CI          |
| Info        | 114.4                             | 2.83                      | 0.477   | -4.98 - 10.63   |
| Info +DELIV | 160.6                             | 49.02                     | 0.000   | 41.30 - 56.73   |
| Control     | 111.5                             | 111.54                    | 0.000   | 105.99 - 117.09 |

### Supplementary Materials Table ST5: Intervention impact on anaemia and malaria using generalized linear models

| VARIABLES    | Anemia             | Post-pregnancy parasitemia |
|--------------|--------------------|----------------------------|
|              | RR (95%CI)         | RR (95%CI)                 |
| INFO         | 1.07 (0.82 - 1.39) | 1.05 (0.46 - 2.40)         |
| INFO+DELIV   | 0.86 (0.66 - 1.14) | 0.18** (0.04 - 0.79)       |
| Observations | 716                | 716                        |

\*\* if p-value <0.0125

Notes: Figure shows estimated treatment impact on anemia and malaria parasitaemia from adjusted Generalized linear models for mother's and household's characteristics as well as ownership and use of insecticide treated bed nets, type of delivery, distance from health facility. Estimated coefficients are shown as prevalence ratios with 95% confidence intervals in parentheses. Standard errors are clustered at the village/quartier level.

### Supplementary Materials Table ST6: Intervention impact on ANC attendance, IFA and SP compliance

| VARIABLES    | Any ANC<br>RR (95%CI) | ≥ 4 ANC visits<br>RR (95%CI) | IFA full compliance<br>RR (95%CI) | ≥ 3 doses of SP<br>RR (95%CI) |
|--------------|-----------------------|------------------------------|-----------------------------------|-------------------------------|
| INFO         | 0.98 (0.82 - 1.18)    | 1.06 (0.78 - 1.44)           | 2.10 (0.78 - 5.66)                | 1.02 (0.80 - 1.29)            |
| INFO+DELIV   | 0.99 (0.83 - 1.19)    | 1.32** (0.99 - 1.76)         | 7.76** (3.27 - 18.43)             | 1.59** (1.28 - 1.97)          |
| Observations | 716                   | 716                          | 716                               | 716                           |

\*\* p<0.0125.

Notes: Figure shows estimated treatment impact on ANC attendance and IFA and SP compliance from adjusted generalized linear models for mother's and household's characteristics as well as ownership and use of insecticide treated bed nets, type of delivery, and distance from health facility. Estimated coefficients are shown as prevalence ratios with 95% confidence intervals in parentheses. Standard errors are clustered at the village/quartier level.

### Supplementary Materials Table ST7: Intervention impact on miscarriage, stillbirth, birthweight and low birthweight

| VARIABLES    | Miscarriage<br>RR (95%CI) | Stillbirth<br>RR (95%CI) | Birth weight<br>Coeff (95%CI) | Low birth weight<br>RR (95%CI) |
|--------------|---------------------------|--------------------------|-------------------------------|--------------------------------|
| INFO         | 1.15 (0.46 - 2.85)        | 0.63 (0.26 - 1.58)       | 14.00 (-98.69 - 126.68)       | 0.61 (0.32 - 1.14)             |
| INFO+DELIV   | 0.54 (0.18 - 1.58)        | 0.42** (0.16 - 1.13)     | 5.64 (-136.04 - 147.32)       | 0.73 (0.39 - 1.36)             |
| Observations | 716                       | 716                      | 557                           | 557                            |
| R-squared    |                           |                          | 0.06                          |                                |

\*\* p<0.0125

Miscarriage, stillbirth and low birth weight estimates are based on Generalized linear models regressions. Birthweight estimates are based on linear regressions with clustering at the study cluster (N=82) level. Estimated coefficients are prevalence ratios with 95% Confidence intervals (CIs) in parentheses. All estimates are adjusted for mother's and household's characteristics as well as ownership and use of insecticide treated bed nets, type of delivery, distance from health facility. Standard errors are clustered at the village/quartier level.



### Supplemental Materials Figure SF1: Change in haemoglobin concentration between baseline and endline by study arm

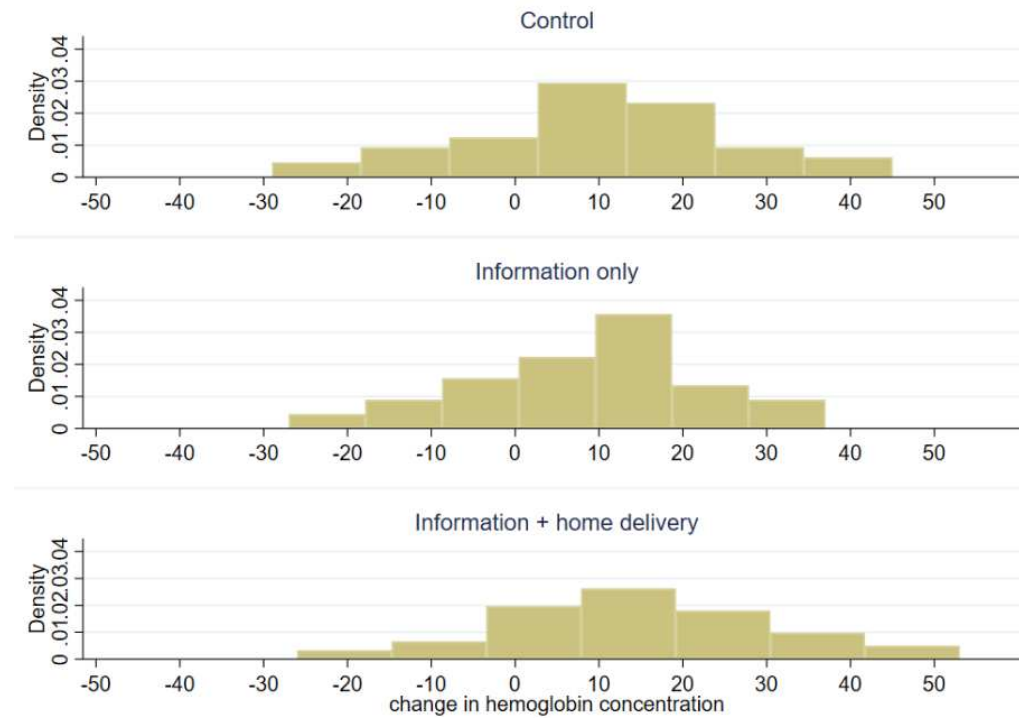

Notes: Figure shows empirical distribution of changes in haemoglobin concentrations between baseline and endline in g/l (x-axis).

**Supplemental Materials Figure SF2: Sulfadoxine-Pyrimethamine used for malaria prophylaxis**

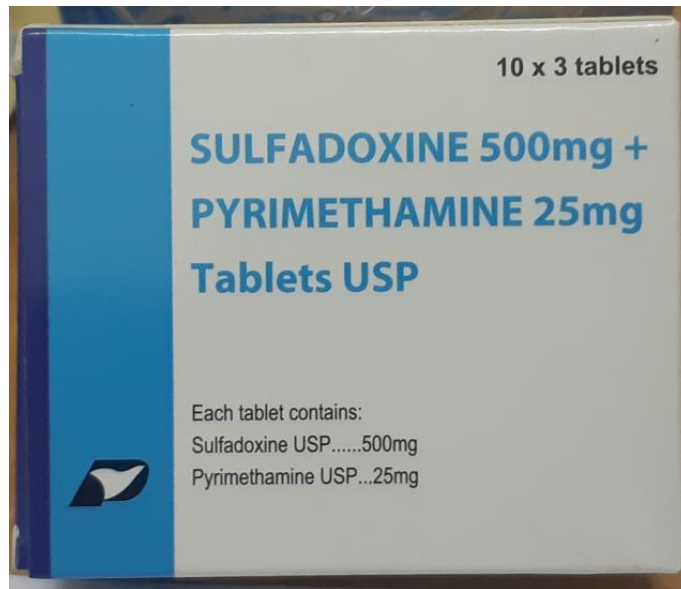

## Supplemental Materials Figure SF3: Ferric hydroxide polymaltose acid used

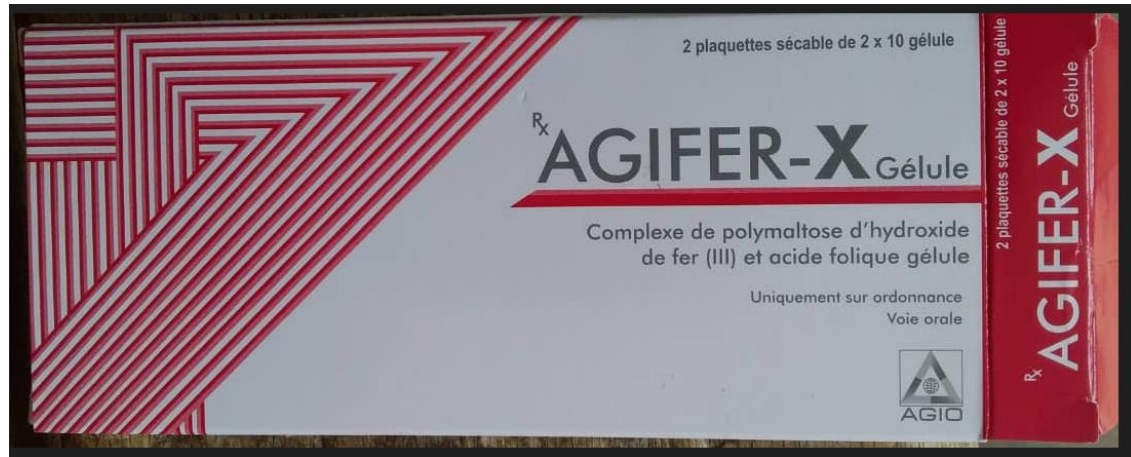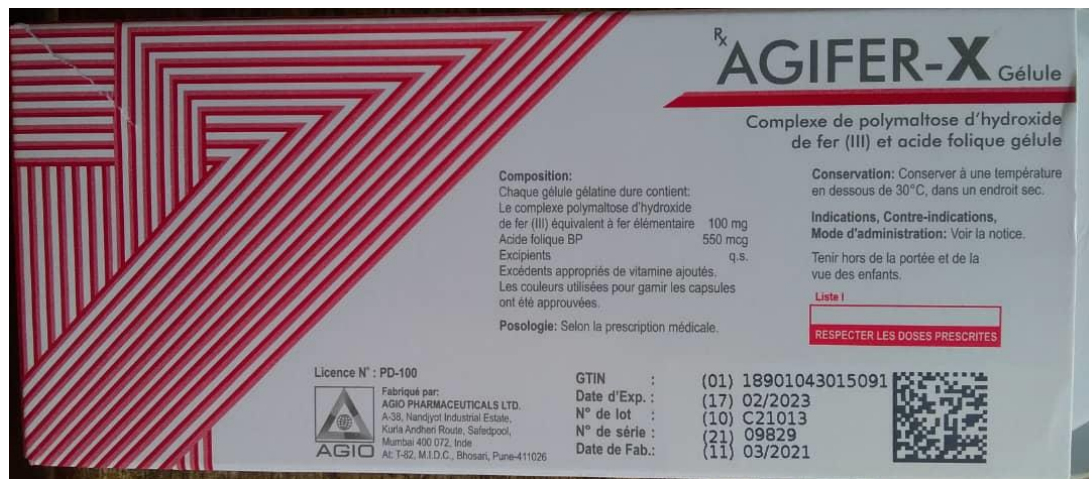

**Supplemental Materials Figure SF4: HRP2-based rapid diagnostic test used to test malaria parasitaemia**

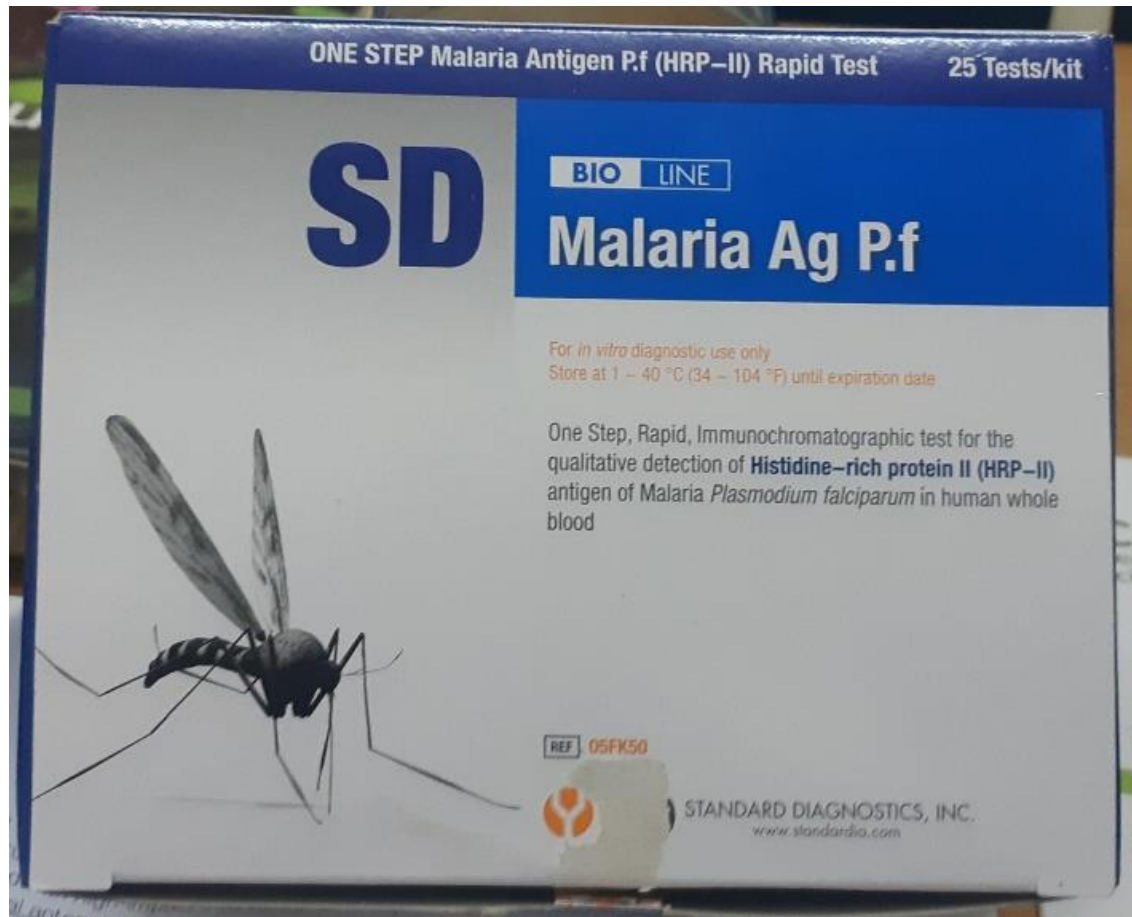

Supplement: inline-supplementary-material-1 [file inline-supplementary-material-1.pdf]
