# Supplementary material
Source: HighWire-hosted journal article supplement (https://gh.bmj.com/content/8/4/e010934)
Supplement: inline-supplementary-material-2 [file inline-supplementary-material-2.pdf]

**Table 1** Structured reflexivity statement to be completed with manuscript submissions from international research partnerships involving researchers from high- and low-to-middle-income countries. This describes 15 questions that should be addressed by corresponding authors on behalf of an international research partnership. The questions are intentionally open-ended and designed to address specific components of equitable research partnership. It may be that not all questions can be addressed (e.g. a small project with minimal or no funding) but researchers should be able to describe individual components that they have considered when developing their partnership.

|                                                |    | QUESTIONS                                                                                                            | ANSWERS                                                                                                                                                                                                                                                                                                                                                                                                                                                                                                                    |
|------------------------------------------------|----|----------------------------------------------------------------------------------------------------------------------|----------------------------------------------------------------------------------------------------------------------------------------------------------------------------------------------------------------------------------------------------------------------------------------------------------------------------------------------------------------------------------------------------------------------------------------------------------------------------------------------------------------------------|
| Study conceptualisation                        | 1  | How does this study address local research and policy priorities?                                                    | In Côte d'Ivoire, 59% of pregnant women are estimated to be anemic. Our study not only assesses the effectiveness of the existing protocol but also assists decision-makers in choosing and directing interventions. Our study is well aligned with local priorities.                                                                                                                                                                                                                                                      |
|                                                | 2  | How were local researchers involved in study design?                                                                 | The 1 <sup>st</sup> and 3 <sup>rd</sup> author of this paper are local researchers. The participation of the local researchers in the study design consisted of:<br>- having discussions with health officials and actors for a better understanding of the national protocol on iron and folic acid supplementation and its implementation;<br>- providing information (number of pregnancies and births per village and neighborhood of residence) on the study area.<br>All randomization procedures were done jointly. |
| Research management                            | 3  | How has funding been used to support the local research team(s)?                                                     | Approximately 100% of the funding was used to cover salaries, training, travel for the local research team and local administrative costs of the local institution.                                                                                                                                                                                                                                                                                                                                                        |
| Data acquisition and analysis                  | 4  | How are research staff who conducted data collection acknowledged?                                                   | The research staff who conducted data collection has been acknowledged in the submitted manuscript (see manuscript section "Acknowledgements").                                                                                                                                                                                                                                                                                                                                                                            |
|                                                | 5  | How have members of the research partnership been provided with access to study data?                                | All members of the research partnership have access to the data.                                                                                                                                                                                                                                                                                                                                                                                                                                                           |
|                                                | 6  | How were data used to develop analytical skills within the partnership?                                              | Data analysis was conducted by the senior author (GF) using a fully blinded data set. The analysis was conducted jointly, and all DO files were shared and reviewed together.                                                                                                                                                                                                                                                                                                                                              |
| Data interpretation                            | 7  | How have research partners collaborated in interpreting study data?                                                  | Research partners did not interfere in the study data interpretation. Data interpretation was done by the local coordinator.                                                                                                                                                                                                                                                                                                                                                                                               |
| Drafting and revising for intellectual content | 8  | How were research partners supported to develop writing skills?                                                      | The first author of the paper (KS) received several rounds of feedback on the paper.                                                                                                                                                                                                                                                                                                                                                                                                                                       |
|                                                | 9  | How will research products be shared to address local needs?                                                         | Research products will be shared through publication, and workshops or feedback meetings with local authorities                                                                                                                                                                                                                                                                                                                                                                                                            |
| Authorship                                     | 10 | How is the leadership, contribution and ownership of this work by LMIC researchers recognised within the authorship? | The leadership, contribution, and ownership of this work by LMIC researchers is acknowledged through the 1 <sup>st</sup> and 3 <sup>rd</sup> authors within the authorship. The role played by each of them is clearly defined in the contributors section.                                                                                                                                                                                                                                                                |
|                                                | 11 | How have early career researchers across the partnership been included within the authorship team?                   | The first author of this paper did this as part of his PhD.                                                                                                                                                                                                                                                                                                                                                                                                                                                                |
|                                                | 12 | How has gender balance been addressed within the authorship?                                                         | Within the authorship, we have 20% female against 80% male.                                                                                                                                                                                                                                                                                                                                                                                                                                                                |
| Training                                       | 13 | How has the project contributed to training of LMIC researchers?                                                     | This project allowed the obtaining of the PhD degree for a student from a LMIC.                                                                                                                                                                                                                                                                                                                                                                                                                                            |
| Infrastructure                                 | 14 | How has the project contributed to improvements in local infrastructure?                                             | We improved provision of supplements in the short run through the project – it is not clear whether these improvements can be sustained.                                                                                                                                                                                                                                                                                                                                                                                   |
| Governance                                     | 15 | What safeguarding procedures were used to protect local study participants and researchers?                          | Careful consenting processes were followed. To ensure confidentiality, participants are only identified by a unique participant number, which is anonymized and cannot be traced back to the person without significant effort. The master database is managed in a secure server.                                                                                                                                                                                                                                         |
